# Supplementary material for: Modeling below-cloud scavenging of size-resolved particles in GEM-MACHv3.1
Source: Copernicus journal article supplement (doi:10.5194/gmd-17-685-2024), 2024-01-26
Supplement: Supplementary file 1 [file gmd-17-685-2024-supplement.pdf]

Supplement of Geosci. Model Dev., 17, 685–707, 2024  
<https://doi.org/10.5194/gmd-17-685-2024-supplement>  
© Author(s) 2024. CC BY 4.0 License.

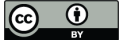

*Supplement of*

## **Modeling below-cloud scavenging of size-resolved particles in GEM-MACHv3.1**

**Roya Ghahreman et al.**

*Correspondence to:* Roya Ghahreman (roya.ghahreman@ec.gc.ca)

The copyright of individual parts of the supplement might differ from the article licence.

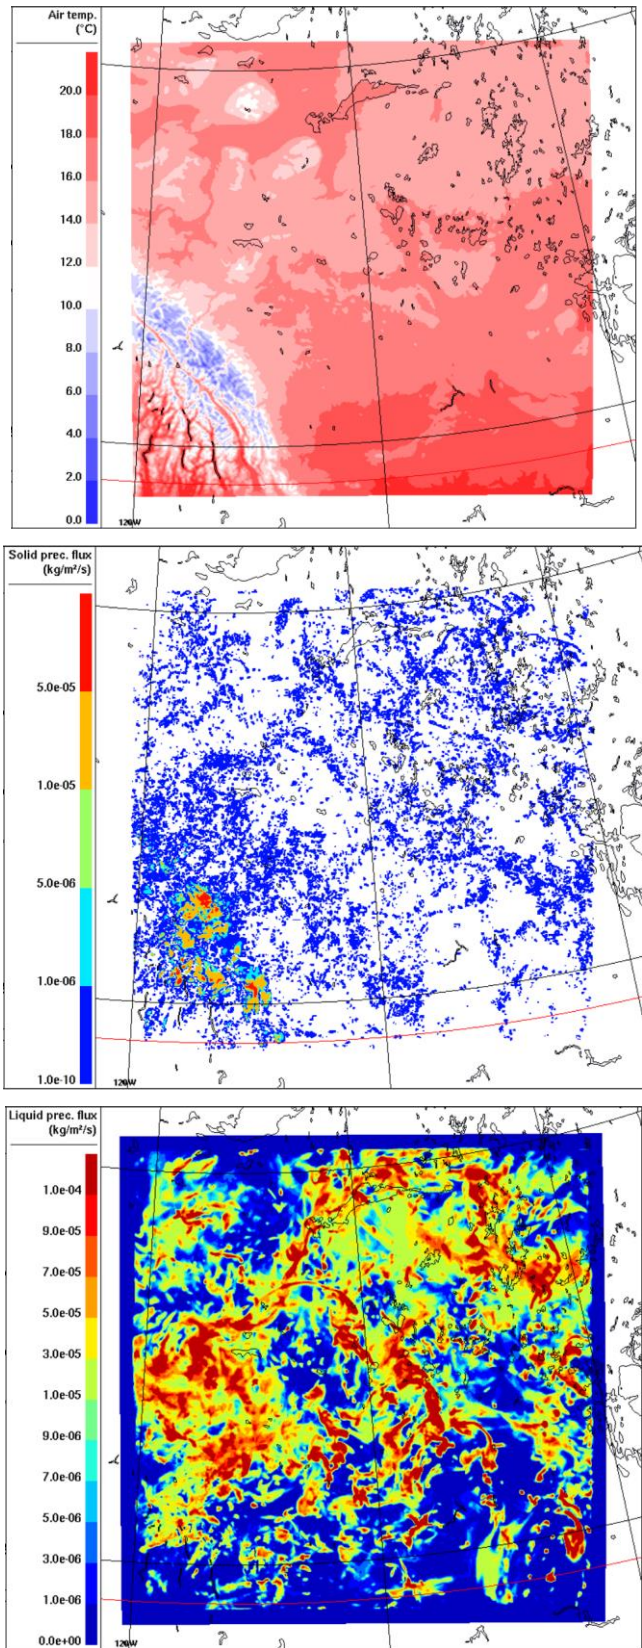

Figure S1: July average temperature, and total snow and rain fluxes.

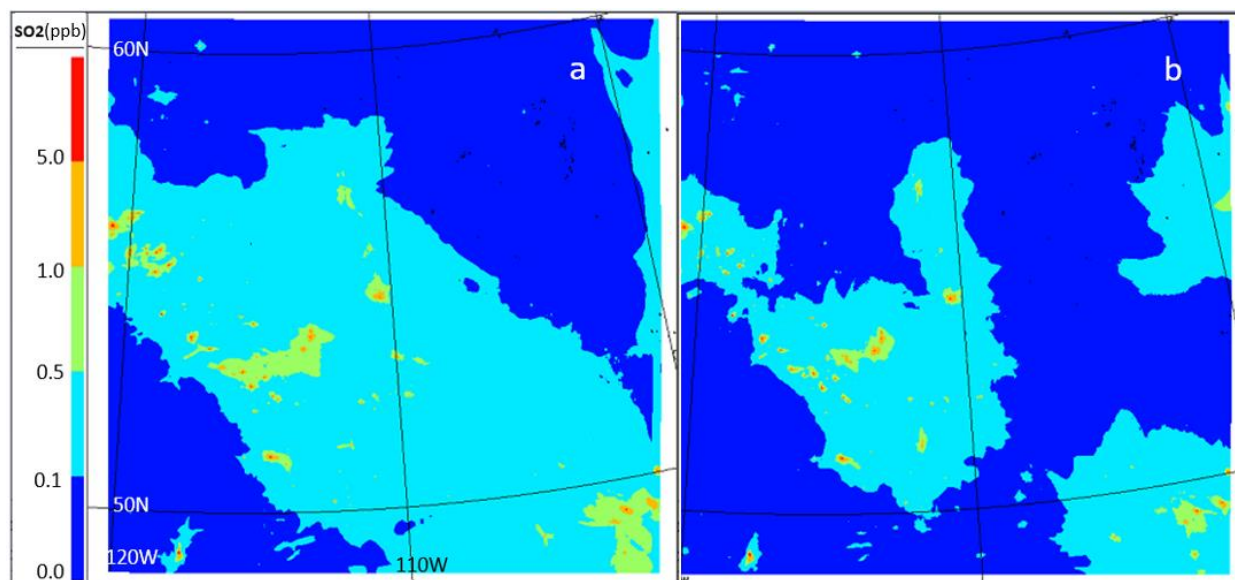

**Figure S2: Averaged  $\text{SO}_2$  concentrations (ppb) for April (a) and July (b). Most of the  $\text{SO}_4^-$  and  $\text{HSO}_3^-$  in the region originates in emissions of  $\text{SO}_2$  from the large stacks in the Oil Sands area. However, their influence when plotted as emissions is not easy to discern, since the relatively high emissions levels occur only in a few model grid cells (those in which the stack sources are located). To better show the relative influence of different sources of  $\text{SO}_2$  as the emitted precursor of  $\text{SO}_4^-$  and  $\text{HSO}_3^-$ , we have provided a map of average  $\text{SO}_2$  concentrations over the region for the period of our simulations, in the SI. This clearly shows the hotspots of  $\text{SO}_2$  associated with the Oil Sands sources, and the relative influence of other sources in the model domain.**

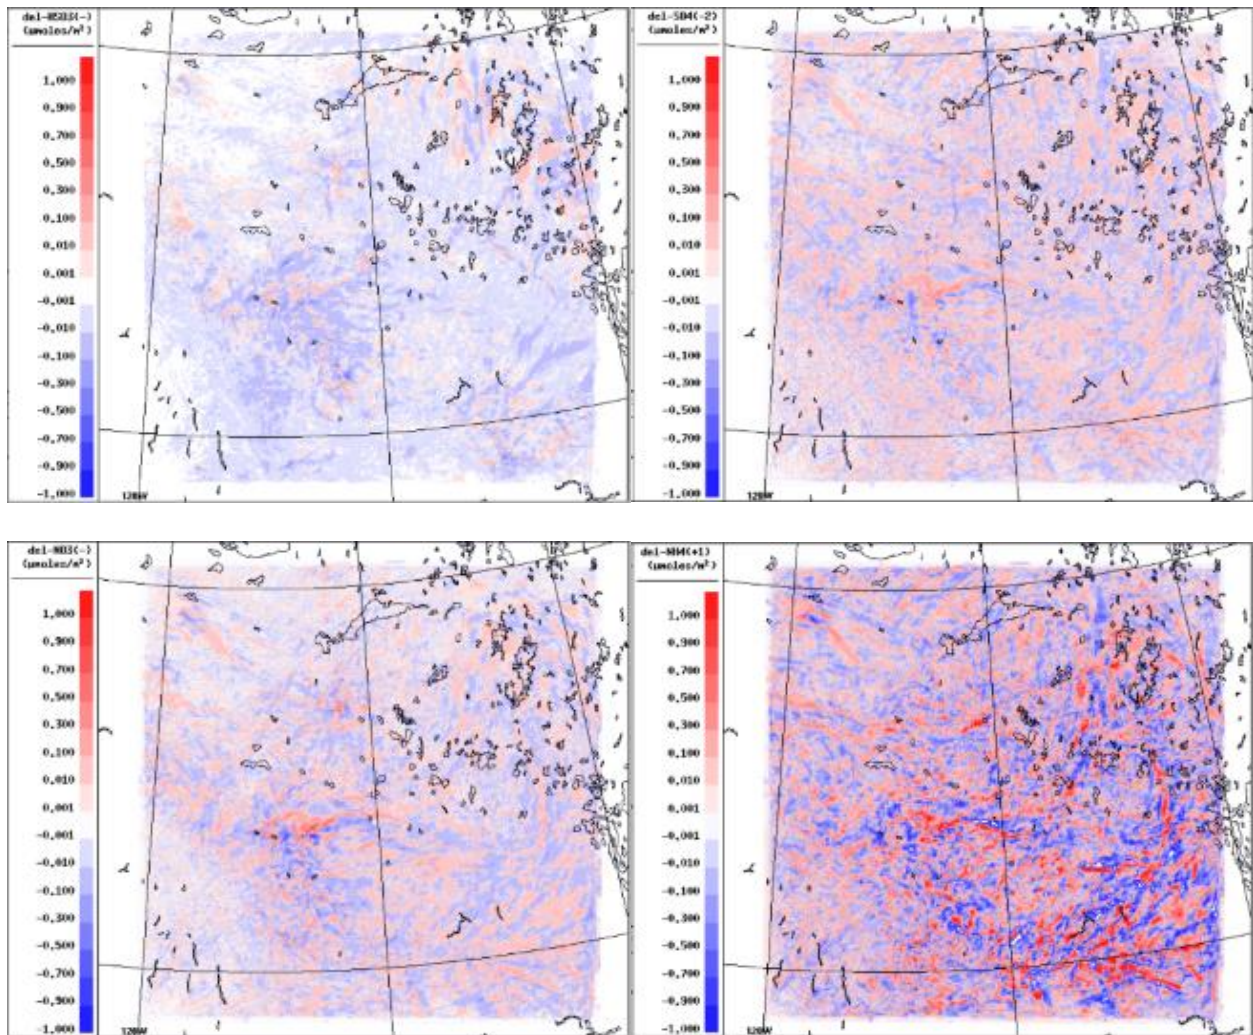

**Figure S3: The net differences of mean  $\text{SO}_3^-$ ,  $\text{SO}_4^-$ ,  $\text{NO}_3^-$  and  $\text{NH}_4^+$  for the multi-phase and base-case (e.g. Multi-phase – base-case) for July 2018.**

**Values of domain-mean depositions - Base-case:  $\text{SO}_3^- = 0.027$  (0.216),  $\text{SO}_4^- = 0.187$  (17.952),  $\text{NO}_3^- = 0.176$  (9.68),  $\text{NH}_4^+ = 1.950$  (21.45)  $\mu\text{mol}/\text{m}^2$  ( $\mu\text{g}/\text{m}^2$ ). Multi-phase:  $\text{SO}_3^- = 0.024$  (2.0),  $\text{SO}_4^- = 0.190$  (18.24),  $\text{NO}_3^- = 0.177$  (9.73),  $\text{NH}_4^+ = 1.962$  (21.59)  $\mu\text{mol}/\text{m}^2$  ( $\mu\text{g}/\text{m}^2$ ).**



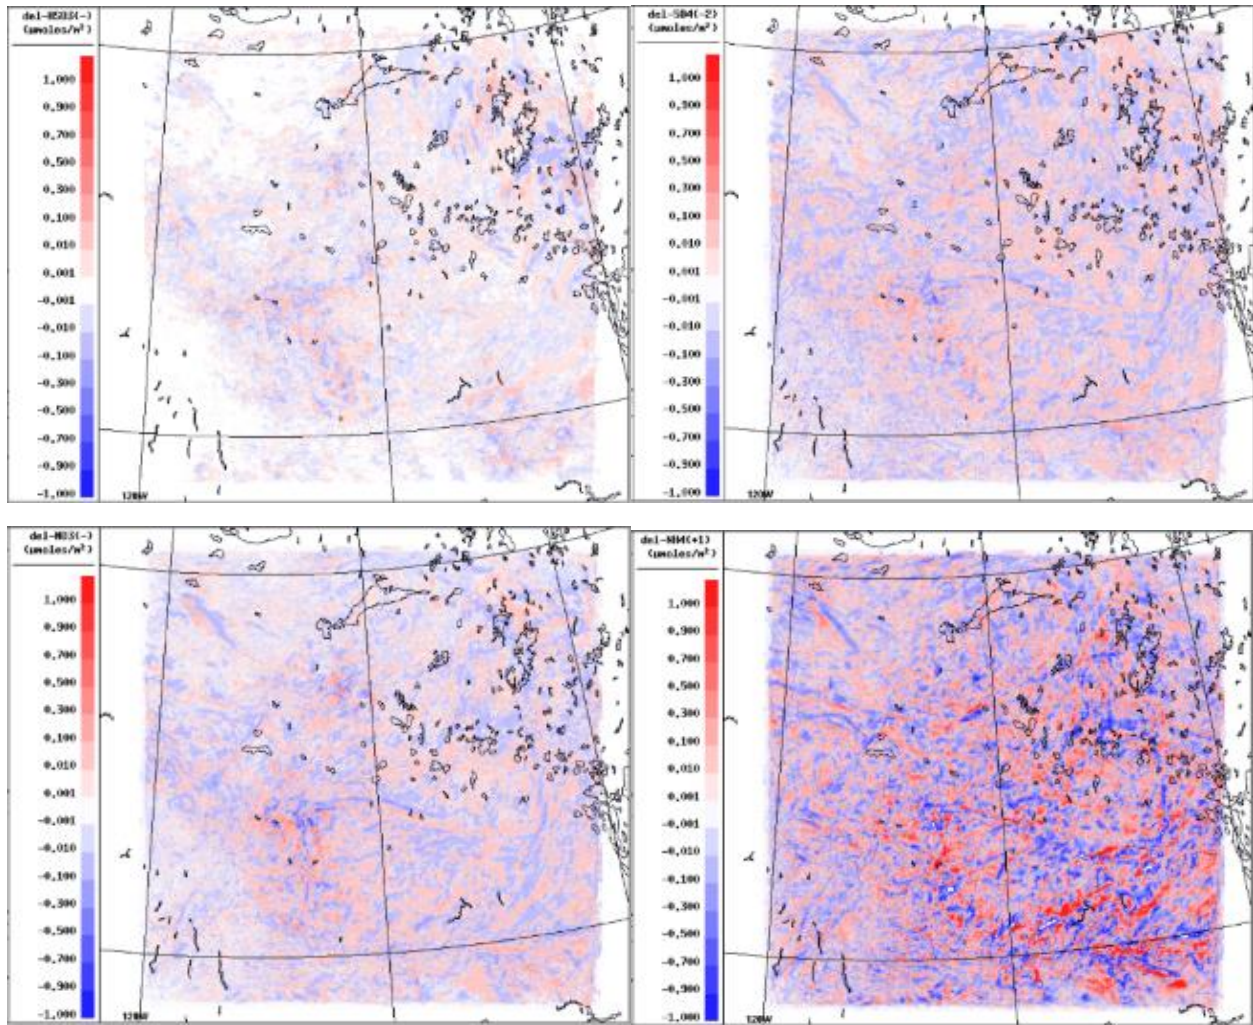

**Figure S4: The net differences of mean  $\text{SO}_3^+$ ,  $\text{SO}_4^-$ ,  $\text{NO}_3^-$  and  $\text{NH}_4^+$  for Wang2014 and multi-phase experiments (e.g. Wang2014 – multi-phase) for July 2018.**

**Values of domain-mean depositions – Wang2014:  $\text{SO}_3^- = 0.024$  (1.92),  $\text{SO}_4^- = 0.191$  (18.37),  $\text{NO}_3^- = 0.178$  (9.79),  $\text{NH}_4^+ = 1.981$  (21.79)  $\mu\text{mol}/\text{m}^2$  ( $\mu\text{g}/\text{m}^2$ ). Multi-phase:  $\text{SO}_3^- = 0.024$  (1.92),  $\text{SO}_4^- = 0.190$  (18.24),  $\text{NO}_3^- = 0.177$  (9.73),  $\text{NH}_4^+ = 1.962$  (21.59)  $\mu\text{mol}/\text{m}^2$  ( $\mu\text{g}/\text{m}^2$ ).**

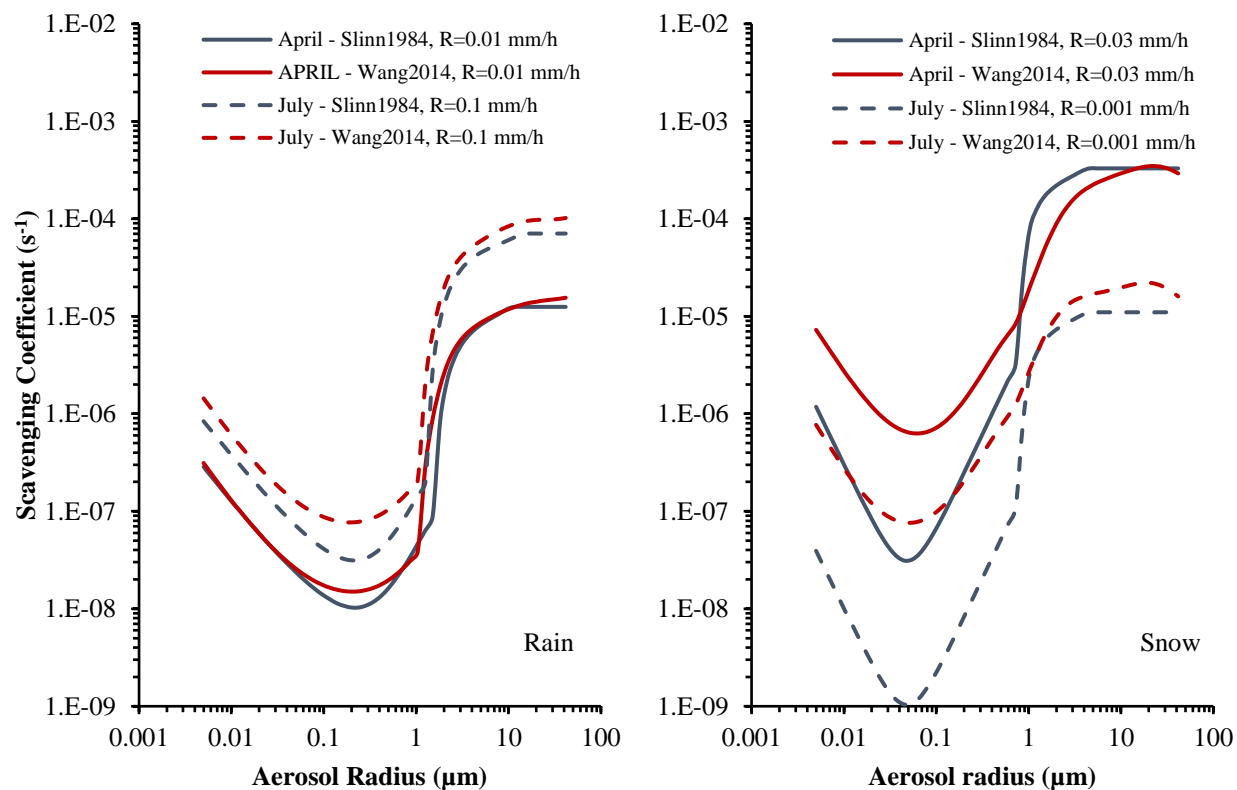

Figure S5: Rain and snow scavenging coefficients versus the particle's sizes for July and April 2018.
